# Supplementary material for: Novel Nanosized Spinel MnCoFeO4 for Low-Temperature Hydrocarbon Oxidation
Source: MDPI journal article supplement (doi:10.3390/nano12213900), 2022-11-04
Supplement: s1 [file s1]

## Supplementary Materials

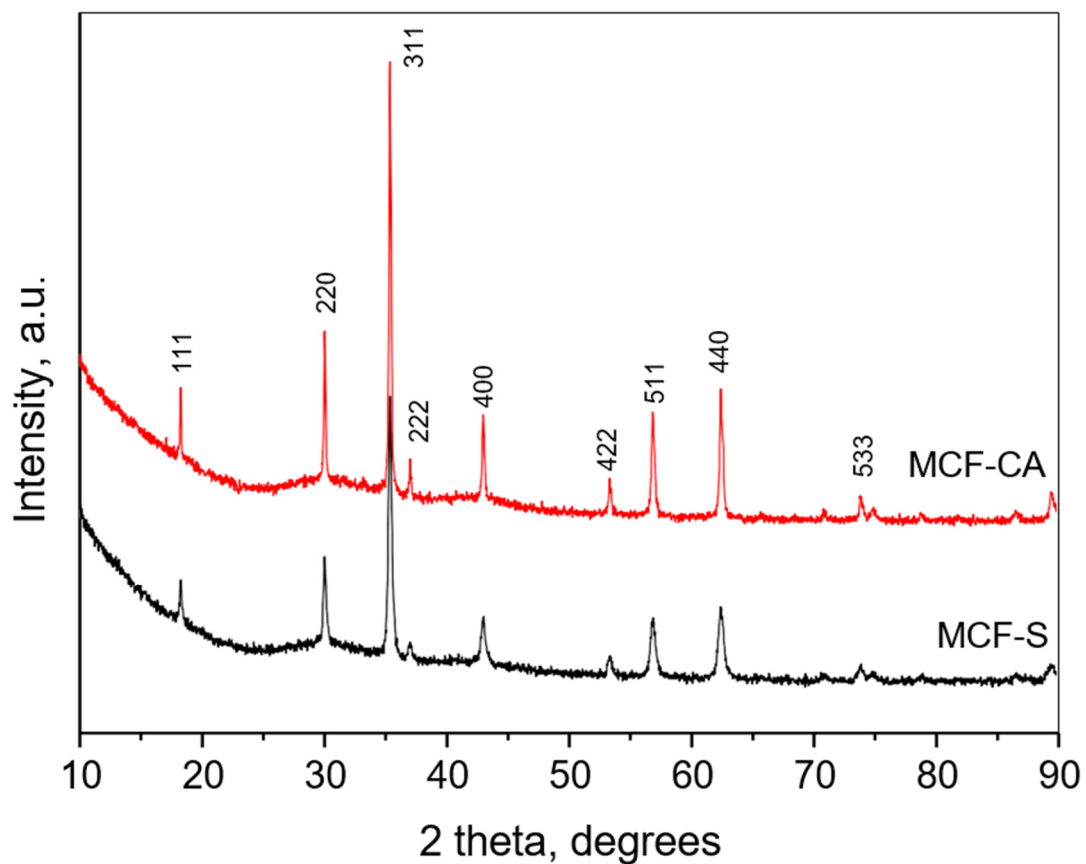

**Figure S1.** XRD patterns of MCF-S (black) and MCF-CA (red) after the thermal analysis up to 800°C. Crystallites size for MCF-S - 36 nm, unit cell parameter  $a=8.4163(8)$  Å, Crystallites size for MCF-CA - 77 nm, unit cell parameter  $a=8.4113(4)$  Å

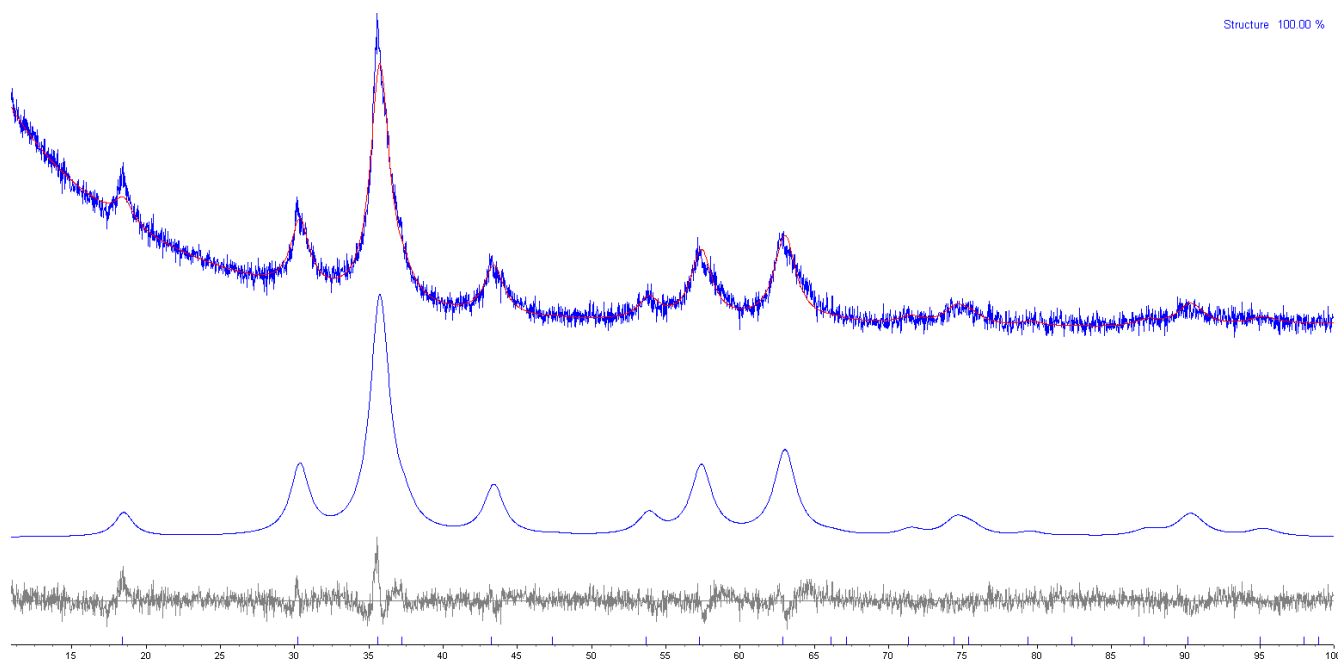

**Figure S2.** Rietveld plot of the MCF-S using one spinel phase. Upper blue line – experimental, red and lower blue line-calculated and grey line-difference plot.

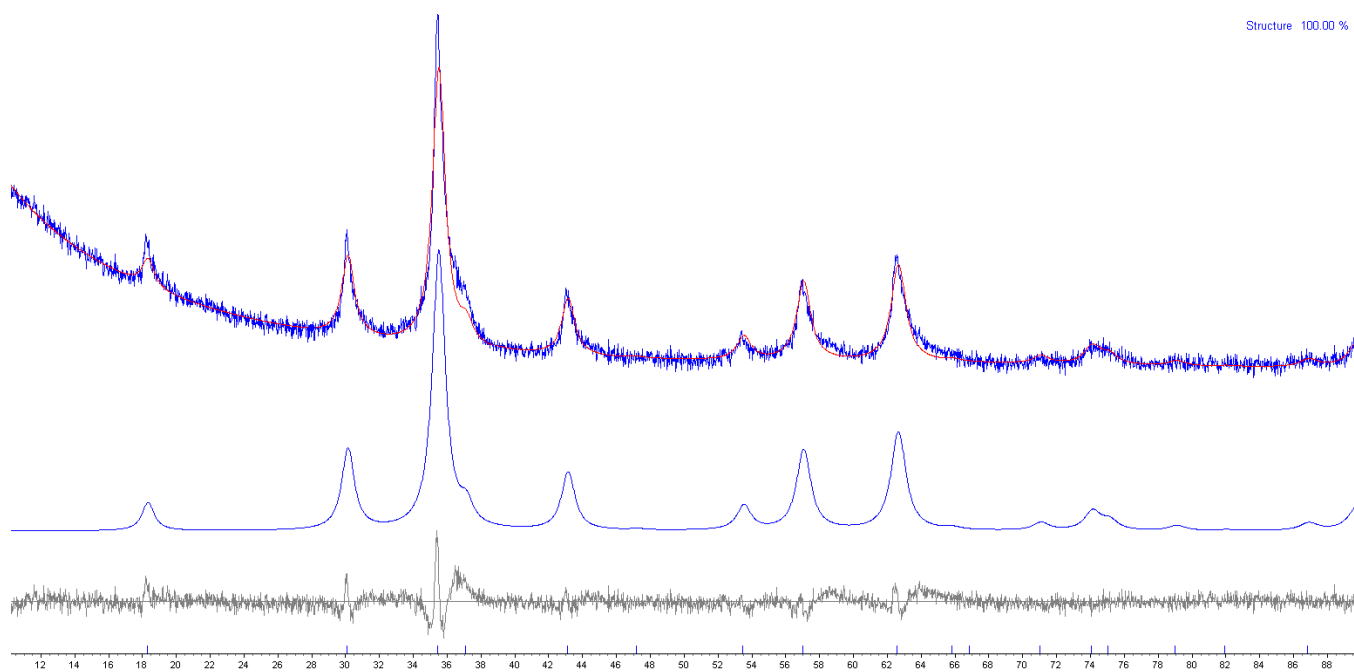

**Figure S3.** Rietveld plot of the MCF-CA using one spinel phase. Upper blue line – experimental, red and lower blue line-calculated and grey line-difference plot.

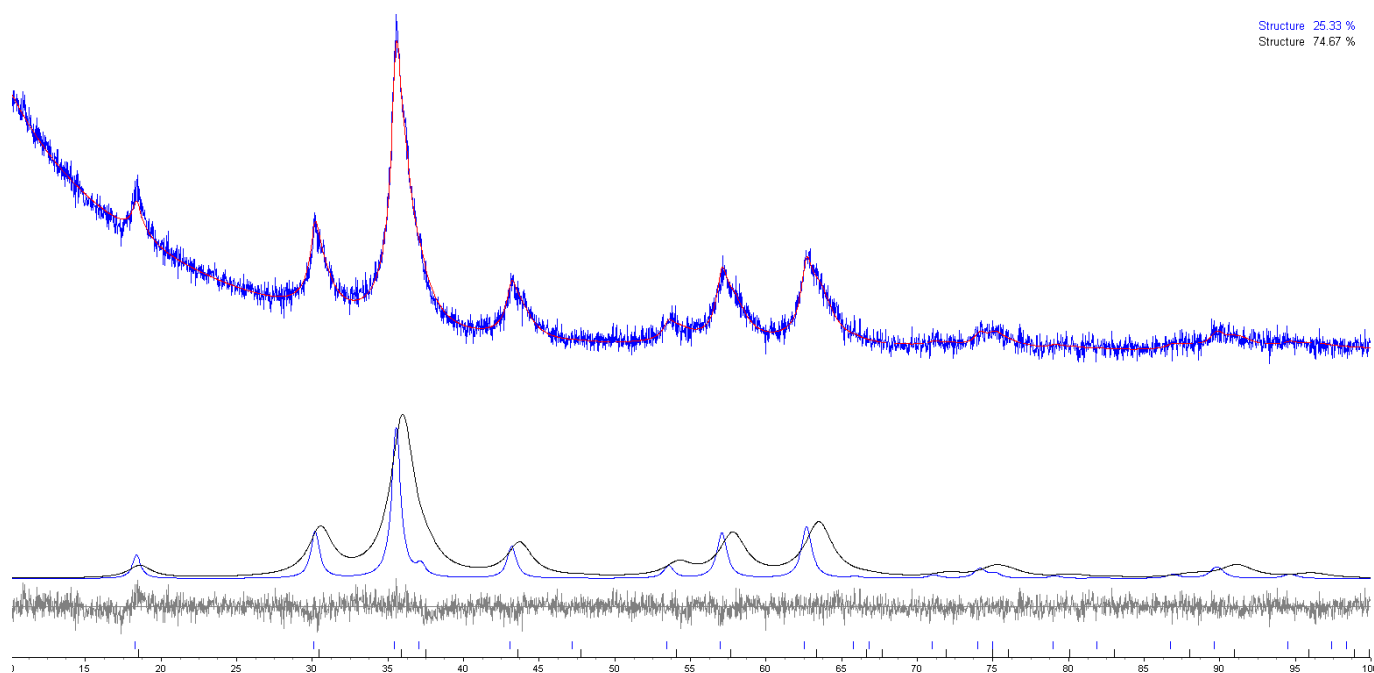

**Figure S4.** Rietveld plot of the MCF-S using two spinel phase. Upper blue line – experimental, red line – sum of the calculated, lower blue and black line-calculated and grey line-difference plot.

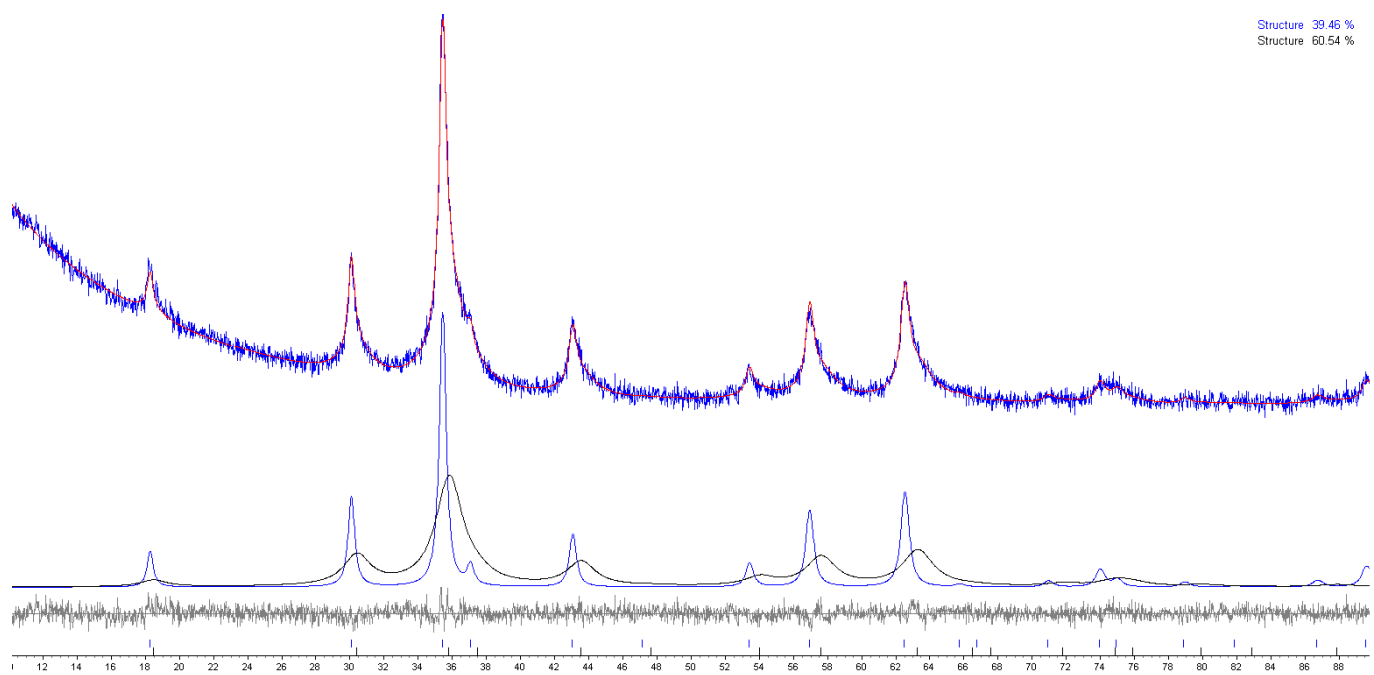

**Figure S5.** Rietveld plot of the MCF-CA using two spinel phase. Upper blue line – experimental, red line – sum of the calculated, lower blue and black line-calculated and grey line-difference plot.

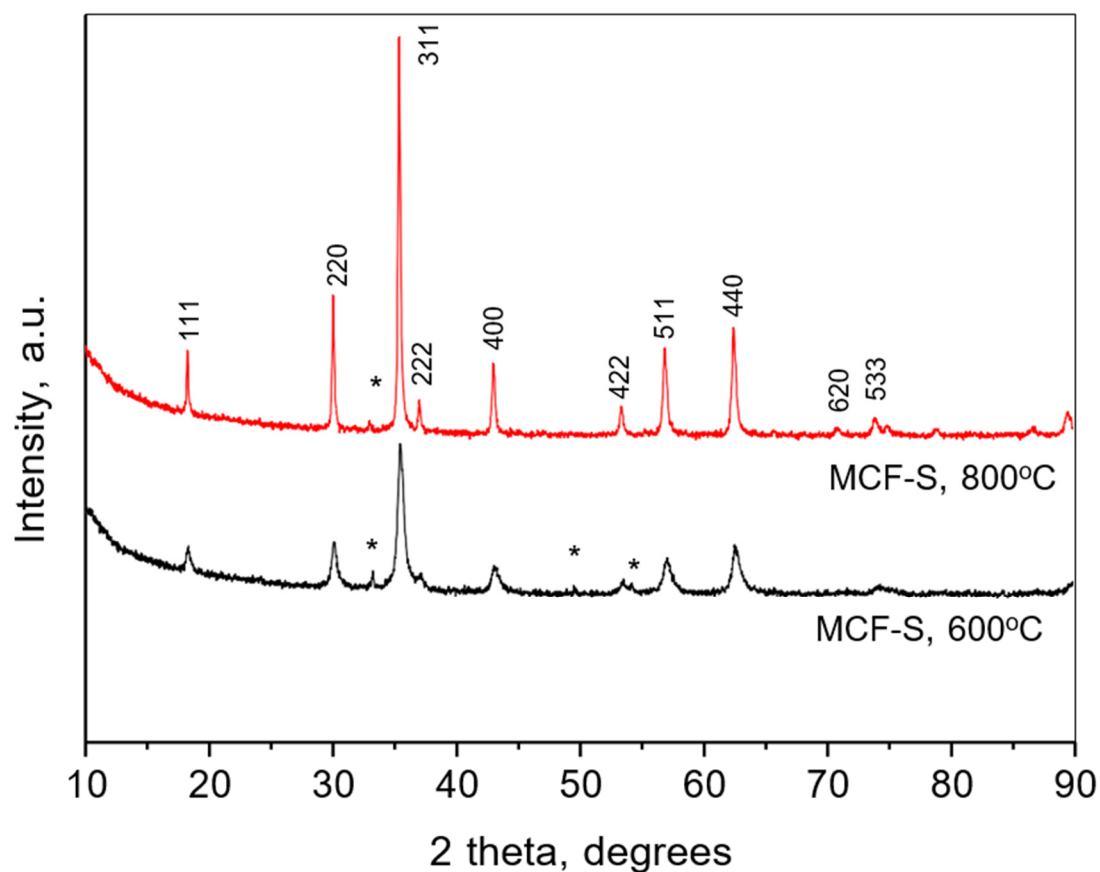

**Figure S6.** XRD patterns of MCF-S after the thermal treatment for 1h in air at 600°C (black) and at 800°C (red). Asterix denotes hematite ( $\text{Fe}_2\text{O}_3$ ) and/or bixbyite ( $\text{Mn}_2\text{O}_3$ ). Crystallites size for MCF-S at 600°C-17 nm, unit cell parameter  $a=8.396(1)\text{\AA}$  Crystallites size for MCF-S at 800°C – 55 nm, unit cell parameter  $a=8.4157(3)\text{\AA}$
